# Supplementary material for: Risk factors of HIV infection among female entertainment workers in Cambodia: Findings of a national survey
Source: PubMed Central journal article supplement (PMC7751854; doi:10.1371/journal.pone.0244357), 2020-12-21
Supplement: pone.0244357.s002.pdf [file pone.0244357.s002.pdf]

លេខកូដ

បិតលេខកូដរបស់អ្នកចូលរួម ដែលព្រីនទុកជាមុន

**តារាងសំណួរសម្រាប់ការអង្កេតតាមដាន ចំណេះដឹង ស្តីពីជំងឺអេដស៍ ការប្រព្រឹត្តិផ្លូវភេទ និងអត្រាប្រេវ៉ាឡង់មេរោគអេដស៍ ឆ្នាំ២០១៦ ក្នុងចំណោមស្ត្រីបម្រើសេវាកំសាន្តសប្បាយ នៅក្នុងប្រទេសកម្ពុជា**

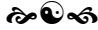

**ការចូលរួមដោយស្ម័គ្រចិត្តនិងសុំការយល់ព្រម**

ខ្ញុំបានអាននិងពន្យល់ទម្រង់សុំការយល់ព្រមទៅអ្នកចូលរួម។ គាត់បានយល់ពីដំណើរការនៃការសិក្សាគោលបំណង ហានិភ័យដែលអាចកើតមាន និងអត្ថប្រយោជន៍ដែលទទួលបាន និងបញ្ជាក់ថាគាត់ចូលរួមការសិក្សានេះដោយស្ម័គ្រចិត្ត។ អ្នកចូលរួមបានពន្យល់សកម្មភាពសិក្សាត្រឡប់មកខ្ញុំវិញ ខ្ញុំជឿជាក់ថាគាត់បានយល់ពីអ្វីដែលនឹងកើតឡើងនៅក្នុងការសិក្សានេះ។ គាត់ផ្តល់ការយល់ព្រមចូលរួមដោយផ្ទាល់មាត់។

លេខខេត្ត:

- |                        |                 |                 |
|------------------------|-----------------|-----------------|
| ១- ភ្នំពេញ             | ៧- កោះកុង       | ១៣- តាកែវ       |
| ២- កំពង់ចាម-ត្បូងឃ្មុំ | ៨- ព្រះសីហនុ    | ១៤- កំពង់ស្ពឺ   |
| ៣- ព្រៃវែង             | ៩- ពោធិសាត់     | ១៥- ឧត្តរមានជ័យ |
| ៤- បាត់ដំបង            | ១០- កណ្តាល      | ១៦- ព្រះវិហារ   |
| ៥- បន្ទាយមានជ័យ        | ១១- កំពង់ធំ     | ១៧- ប៉ៃលិន      |
| ៦- សៀមរាប              | ១២- កំពង់ឆ្នាំង | ១៨- រតនៈគីរី    |

លេខចង្កោម (ក្លាស៊័រ):

ប្រភេទស្ត្រីបម្រើសេវាកំសាន្តសប្បាយ : ១. នារីបម្រើការងារនៅតាមអតីតផ្ទះបន លេខកូដ   
 ២. នារីបម្រើសេវាកំសាន្តឯករាជ្យ  
 ៣. នារីបម្រើស្រាបៀរ  
 ៤. នារីបម្រើការងារម៉ូឌ/ម៉ាស្សា  
 ៥. នារីបម្រើសេវានៅបៀរហ្គាឌិន/ភោជនីយដ្ឋាន

តើអ្នកចូលរួមបោះបង់ចោលការសំភាសន៍ដែរឬទេ?

១. បោះបង់ចោល (នៅសំនួរទី) សំនួរ
២. មិនបានបោះបង់ចោល

ឈ្មោះអ្នកសំភាសន៍: .....

ហត្ថលេខាអ្នកសំភាសន៍ \_\_\_\_\_

កាលបរិច្ឆេទ: ..... / ..... / ២០១៥

បានពិនិត្យផ្ទៀងផ្ទាត់ដោយប្រធានក្រុមការងារ: ហត្ថលេខា.....ថ្ងៃទី.....ខែ.....ឆ្នាំ២០១៦

**ផ្នែកទី១: លក្ខណប្រជាសាស្ត្រសង្គម**

| លរ | សំណួរ                                                                                                   | ក្នុង ចម្លើយ                                                                                                                                           | រំលង | ក្នុង |
|----|---------------------------------------------------------------------------------------------------------|--------------------------------------------------------------------------------------------------------------------------------------------------------|------|-------|
| ១  | តើអ្នកមានអាយុប៉ុន្មាន? (អាយុពេញឆ្នាំ)                                                                   | អាយុ..... ឆ្នាំ<br>(អាយុ ១៨ ទៅ ៤៩ ឆ្នាំ)                                                                                                               |      |       |
| ២  | តើនាងរៀននៅសាលាបានប៉ុន្មានឆ្នាំ?                                                                         | ចំនួន.....ឆ្នាំ<br>មិនបានរៀន: ០                                                                                                                        |      |       |
| ៣  | តើនាងរៀបការហើយឬនៅ?<br><b>អានចម្លើយទាំងអស់។ អ្នកចូលរួមអាចជ្រើសរើសបានតែមួយទេ</b>                          | មិនដែលរៀបការ: ០<br>រៀបការហើយនិងកំពុងរស់នៅជាមួយគ្នា: ១<br>រៀបការហើយតែរស់នៅឆ្ងាយពីគ្នា: ២<br>លែងលះគ្នា/មេម៉ាយ: ៣<br>មិនបានរៀបការប៉ុន្តែរស់នៅជាមួយដៃគូ: ៤ |      |       |
| ៤  | តើនាងមករស់នៅ (ឈ្មោះ ក្រុង ប្រជុំជនដែលស្រ្តីរស់នៅនិងធ្វើការងារ) អស់រយៈពេលប៉ុន្មានខែហើយ? (ខែពេញលេញ)       | ចំនួន ..... ខែ<br>តិចជាងមួយខែ: ១<br>លើសពី១២ខែ: ១៣                                                                                                      |      |       |
| ៥  | ក្នុងរយៈពេល១២ខែកន្លងមក តើមានចំនួនខេត្ត/រាជធានី ប៉ុន្មាន ដែលនាងធ្លាប់បានរស់នៅ រួមទាំងខេត្ត-រាជធានីនេះផង? | ចំនួនខេត្ត-រាជធានី .....<br>អត់បានទៅណា: ០                                                                                                              |      |       |
| ៦  | តើនាងធ្វើការនៅទីកន្លែង បច្ចុប្បន្ននេះ បានរយៈពេល ប៉ុន្មានខែហើយ?                                          | ចំនួន.....ខែ<br>តិចជាងមួយខែ: ០<br>លើសពី១២ខែ: ១៣                                                                                                        |      |       |

|    |                                                                                                                                                            |                                                                                                                                                                                                                                                                                                                  |                |    |
|----|------------------------------------------------------------------------------------------------------------------------------------------------------------|------------------------------------------------------------------------------------------------------------------------------------------------------------------------------------------------------------------------------------------------------------------------------------------------------------------|----------------|----|
| ៧  | <p>មុនពេលមកធ្វើការងារនេះ តើ<br/>នាងធ្លាប់បានធ្វើការណាមួយ<br/>ដូចខាងក្រោមដែរឬទេ?<br/>មិនយកការងារដែលកំពុងធ្វើទេ<br/>(សូមអានចំលើយ, អាចមានចំ<br/>លើយច្រើន)</p> | <p>អ្នករាំតាមរង្គសាល/ភ្លឺប: ១<br/>អ្នកម៉ាស្សា: ២<br/>អ្នកបំរើស្រាបៀរ: ៣<br/>អ្នកបំរើការងារការ៉ាអូខេ: ៤<br/>អ្នកបំរើការងារនៅបៀរហ្គារដិន: ៥<br/>អ្នកបំរើការតាមភោជនីយដ្ឋាន: ៦<br/>នារីរកស៊ីផ្លូវភេទនៅក្នុងផ្ទះបន: ៧<br/>នារីបំរើសេវាកំសាន្តឯករាជ្យ: ៨<br/>កម្មការិនីរោងចក្រ: ៩<br/>មិនមែនការងារទាំងអស់ខាងលើ: ៩៩</p> |                |    |
| ៨  | <p>តើនាងចាប់ផ្តើមរួមភេទលើក<br/>ដំបូងនៅអាយុប៉ុន្មានឆ្នាំ?</p>                                                                                               | <p>អាយុ..... ឆ្នាំ<br/>មិនដែលរួមភេទ: ០</p>                                                                                                                                                                                                                                                                       | ទៅសំនួរ        | ១៤ |
| ៩  | <p>ចាប់តាំងពីនាងធ្វើការជានារីបំរើ<br/>សេវាកំសាន្ត តើនាងធ្លាប់មាន<br/>ផ្ទៃពោះប៉ុន្មានដង?</p>                                                                | <p>ចំនួនផ្ទៃពោះ:.....ដង<br/>មិនធ្លាប់មានផ្ទៃពោះ: ០</p>                                                                                                                                                                                                                                                           | <u>ទៅសំនួរ</u> | ១៤ |
| ១០ | <p>បច្ចុប្បន្ននេះ តើនាងមានកូន<br/>ប៉ុន្មាននាក់?</p>                                                                                                        | <p>ចំនួន.....កូន<br/>មិនដែលបានបង្កើតកូន: ០</p>                                                                                                                                                                                                                                                                   |                |    |
| ១១ | <p>ក្នុងខណៈពេលដែលនាង ធ្វើ<br/>ការជានារីបំរើសេវាកំសាន្ត តើ<br/>នាងធ្លាប់បានរំលូតកូនប៉ុន្មាន<br/>ដងដែរ?</p>                                                  | <p>ចំនួនរំលូតកូន .....<br/>មិនធ្លាប់រំលូតកូន: ០</p>                                                                                                                                                                                                                                                              | <u>ទៅសំនួរ</u> | ១៤ |
| ១២ | <p>តើនាងបានរំលូតកូនលើកចុង<br/>ក្រោយប៉ុន្មានខែកន្លងមកហើយ<br/>នៅពេលធ្វើការជានារីបំរើសេវា<br/>កំសាន្ត?</p>                                                    | <p>ចំនួន.....ខែ<br/>តិចជាងមួយខែ: ១</p>                                                                                                                                                                                                                                                                           |                |    |
| ១៣ | <p>តើនាងបានទៅធ្វើការរំលូតកូន<br/>លើកចុងក្រោយនៅទីណា?<br/>(ចម្លើយមានតែមួយ)</p>                                                                               | <p>គ្លីនិកឯកជន: ១<br/>ធុបបូរាណ (គ្រូបូរាណ) ២<br/>មណ្ឌលសុខភាព/មន្ទីរពេទ្យរដ្ឋ: ៣<br/>គ្លីនិកអង្គការ: ៤</p>                                                                                                                                                                                                        |                |    |

|  |  |                                                          |  |  |
|--|--|----------------------------------------------------------|--|--|
|  |  | ទិញថ្នាំពីឱសថស្ថានមកលេប: ៥<br>ផ្សេងៗ(សូមបញ្ជាក់).....: ៦ |  |  |
|--|--|----------------------------------------------------------|--|--|

**ផ្នែកទី២: ឥរិយាបថប្រឈមនឹងគ្រោះថ្នាក់**

| លរ | សំណួរ                                                                                                                                                                | ក្នុង ចម្លើយ                                                                                                     | រំលង    | ក្នុង |
|----|----------------------------------------------------------------------------------------------------------------------------------------------------------------------|------------------------------------------------------------------------------------------------------------------|---------|-------|
| ១៤ | ក្នុងរយៈពេល១២ខែកន្លងមក<br>តើនាងធ្លាប់មានមិត្តប្រុស/<br>សង្សារ ប៉ុន្មាននាក់?                                                                                          | ចំនួន.....នាក់<br>មិនធ្លាប់មានមិត្តប្រុស/សង្សារ: ០                                                               | ទៅសំនួរ | ១៩    |
| ១៥ | ក្នុងរយៈពេល ១២ខែកន្លងមក<br>តើនាងធ្លាប់បានរួមភេទ<br>ជាមួយ មិត្តប្រុស/សង្សារ ដែរ<br>ឬទេ?                                                                               | ធ្លាប់: ១<br>មិនធ្លាប់: ២                                                                                        | ទៅសំនួរ | ១៩    |
| ១៦ | រយៈពេល ១ខែកន្លងមកនេះ<br>តើនាងធ្លាប់បានរួមភេទ<br>ជាមួយមិត្តប្រុស/សង្សាររបស់<br>នាងប៉ុន្មានដងដែរ?                                                                      | ចំនួន ..... ដង<br>មិនធ្លាប់រួមភេទ: ០                                                                             |         |       |
| ១៧ | រយៈពេល ៣ខែកន្លងមកនេះ<br>តើនាងធ្លាប់បានរួមភេទ<br>ជាមួយមិត្តប្រុស/សង្សាររបស់<br>នាងប៉ុន្មានដងដែរ?                                                                      | ចំនួន ..... ដង<br>មិនធ្លាប់រួមភេទ: ០                                                                             |         |       |
| ១៨ | ក្នុងរយៈពេល ៣ខែកន្លងមក<br>នេះ តើនាងបានប្រើស្រោមអ<br>នាម័យយ៉ាងណាដែរ<br>នៅពេលរួមភេទជាមួយ មិត្ត<br>ប្រុស/សង្សាររបស់នាង<br>(សង្សារចុងក្រោយបង្អស់ ឬ<br>សង្សារបច្ចុប្បន្ន) | មិនធ្លាប់រួមភេទ: ០<br>គ្រប់ពេល (១០០%): ១<br>ញឹកញាប់ (៦០-៩៩ %): ២<br>ម្តងម្កាល (១-៥៩%): ៣<br>មិនដែលប្រើសោះ(០%): ៤ |         |       |
| ១៩ | ក្នុងរយៈពេល ៣ខែកន្លងមក<br>នេះ តើនាងបានប្រើស្រោមអ<br>នាម័យយ៉ាងណាដែរ ជាមួយ<br>ប្តីរបស់នាង?                                                                             | មិនធ្លាប់រួមភេទ: ០<br>គ្រប់ពេល (១០០%): ១<br>ញឹកញាប់ (៦០-៩៩ %): ២<br>ម្តងម្កាល (១-៥៩%): ៣                         |         |       |

|     |                                                                                                                                   |                                                                                                                      |                    |          |
|-----|-----------------------------------------------------------------------------------------------------------------------------------|----------------------------------------------------------------------------------------------------------------------|--------------------|----------|
|     |                                                                                                                                   | មិនដែលប្រើសោះ(0%): ៤                                                                                                 |                    |          |
| ២០  | ក្នុងរយៈពេល ១២ខែកន្លងមក តើនាងធ្លាប់ទទួលអំណោយ ឬ ប្រាក់ពីប្រុសៗដើម្បីប្តូរការ រួមភេទដែរឬទេ? (មិនគិតរួម ជាមួយមិត្តប្រុស/សង្សារ/ប្តី) | មិនដែលរួមភេទ: ០<br>១. ធ្លាប់: ១<br>មិនធ្លាប់: ២                                                                      | ទៅសំនួរ<br>ទៅសំនួរ | ៣៤<br>៣៤ |
| ២១  | តើក្នុង ១សប្តាហ៍ នាងរួមភេទ ជាមួយភ្ញៀវប៉ុន្មាននាក់គិតជា មធ្យម? (មិនគិតរួមជា មិត្តប្រុស/សង្សារ/ប្តី)                                | ចំនួនភ្ញៀវ.....នាក់<br>មិនបានរួមភេទ: ០                                                                               |                    |          |
| ២២  | នៅថ្ងៃធ្វើការចុងក្រោយរបស់ នាង តើនាងរួមភេទជាមួយ ភ្ញៀវបាន ចំនួនប៉ុន្មាននាក់? (កំឡុងពេល១២ខែចុង ក្រោយ)                                | ចំនួនភ្ញៀវ.....នាក់<br>មិនបានរួមភេទ/អត់ភ្ញៀវ: ០                                                                      |                    |          |
| ២៣  | នៅពេលរួមភេទជាមួយភ្ញៀវ ចុងក្រោយបំផុត តើនាងបាន ប្រើស្រោមអនាម័យដែរឬទេ? (កំឡុងពេល១២ខែចុង ក្រោយ)                                       | ចាស់: ១<br>មិនបានប្រើ: ២                                                                                             |                    |          |
| ២៤. | ក្នុងរយៈពេល ១សប្តាហ៍កន្លង មក តើនាងបានប្រើស្រោមអ នាម័យយ៉ាងណាដែរជាមួយ ភ្ញៀវរបស់នាង?                                                 | មិនបានរួមភេទជាមួយភ្ញៀវ: ០<br>គ្រប់ពេល(១០០%): ១<br>ញឹកញាប់ (៦០-៩៩%): ២<br>ម្តងម្កាល(១-៥៩%): ៣<br>មិនដែលប្រើសោះ(0%): ៤ |                    |          |
| ២៥  | ក្នុងរយៈពេល ៣ខែកន្លងមក តើនាងបានប្រើស្រោមអនាម័ យយ៉ាងណាដែរ នៅពេលរួមភេទ ជាមួយភ្ញៀវរបស់នាង?                                           | មិនបានរួមភេទជាមួយភ្ញៀវ: ០<br>គ្រប់ពេល(១០០%): ១<br>ញឹកញាប់ (៦០-៩៩%): ២<br>ម្តងម្កាល(១-៥៩%): ៣<br>មិនដែលប្រើសោះ(0%): ៤ |                    |          |

|    |                                                                                                                                    |                                                                                                                      |                    |          |
|----|------------------------------------------------------------------------------------------------------------------------------------|----------------------------------------------------------------------------------------------------------------------|--------------------|----------|
| ២៦ | តើបច្ចុប្បន្ននេះនាងមានភ្ញៀវ<br>រួមភេទទៀងទាត់(ម៉ួយ)ដែរ<br>ឬទេ? (គេងជាមួយនាងលើស<br>ពី ៥ដង)                                           | ចាស់: ១<br>មិនមាន: ២                                                                                                 | ទៅសំនួរ            | ២៨       |
| ២៧ | ក្នុង ១ខែកន្លងមក តើនាង<br>បានប្រើស្រោមអនាម័យ<br>ជាមួយភ្ញៀវទៀងទាត់(ម៉ួយ)<br>យ៉ាងណាដែរ?                                              | មិនបានរួមភេទជាមួយភ្ញៀវ: ០<br>គ្រប់ពេល(១០០%): ១<br>ញឹកញាប់ (៦០-៩៩%): ២<br>ម្តងម្កាល(១-៥៩%): ៣<br>មិនដែលប្រើសោះ(០%): ៤ |                    |          |
| ២៨ | ក្នុងរយៈពេល ១២ខែកន្លងមក<br>តើនាងបានដែលរួមភេទ<br>ជាមួយអ្នកចិញ្ចឹមដែរឬទេ?                                                            | មិនមានអ្នកចិញ្ចឹម: ០<br>ចាស់: ១<br>ទេ: ២                                                                             | ទៅសំនួរ<br>ទៅសំនួរ | ៣០<br>៣០ |
| ២៩ | ក្នុងរយៈពេល ៣ខែកន្លងមក<br>តើនាងបានប្រើស្រោមអនាម័<br>យជាមួយអ្នកចិញ្ចឹមញឹកញាប់<br>យ៉ាងណាដែរ? (អ្នកចិញ្ចឹមចុង<br>ក្រោយ ឬ បច្ចុប្បន្ន) | មិនបានរួមភេទទេ: ០<br>គ្រប់ពេល(១០០%): ១<br>ញឹកញាប់ (៦០-៩៩%): ២<br>ម្តងម្កាល(១-៥៩%): ៣<br>មិនដែលប្រើសោះ(០%): ៤         |                    |          |
| ៣០ | ក្នុងរយៈពេល ៣ខែកន្លងមក<br>តើនាងធ្លាប់រួមភេទតាមរន្ធកូន<br>ដែរឬទេ?                                                                   | មិនដែលរួមភេទ: ០<br>ចាស់ធ្លាប់: ១<br>មិនធ្លាប់: ២                                                                     |                    |          |
| ៣១ | ក្នុងរយៈពេល ៣ខែកន្លងមក<br>តើនាងធ្លាប់រួមភេទដោយប្រើ<br>មាត់ដែរឬទេ?                                                                  | មិនដែលរួមភេទ: ០<br>ចាស់ធ្លាប់: ១<br>មិនធ្លាប់: ២                                                                     |                    |          |
| ៣២ | ក្នុងរយៈពេល ៣ខែកន្លងមក<br>តើនាងធ្លាប់រួមភេទដោយមិន<br>បានប្រើស្រោមអនាម័យ<br>ដែរឬទេ ក្រៅពីថ្មី?                                      | មិនដែលរួមភេទ/មិនធ្លាប់រួមភេទជាមួយភ្ញៀវ:<br>០<br>ចាស់ធ្លាប់: ១<br>មិនធ្លាប់: ២                                        | ទៅសំនួរ<br>ទៅសំនួរ | ៣៤<br>៣៤ |
| ៣៣ | ហេតុអ្វីបានជាអ្នកមិនប្រើ<br>ស្រោមអនាម័យ នៅពេលរួម                                                                                   | ចង់មានផ្ទៃពោះ: ១<br>គិតថា គាត់អត់មានជម្ងឺកាមរោគ ឬមេរោគអេ<br>ដស៍: ២                                                   |                    |          |

|           |                                                                                                                                                |                                                                                                                                                                                                                                                                                                                                                                                                                   |  |  |
|-----------|------------------------------------------------------------------------------------------------------------------------------------------------|-------------------------------------------------------------------------------------------------------------------------------------------------------------------------------------------------------------------------------------------------------------------------------------------------------------------------------------------------------------------------------------------------------------------|--|--|
|           | <p>ភេទ? (សូមអានចម្លើយទាំងអស់ ចម្លើយអាចមានច្រើន)</p>                                                                                            | <p>គាត់បញ្ចុះបញ្ចូល មិនអោយប្រើស្រោម: ៣<br/>         គាត់បង្ខំ មិនអោយប្រើស្រោម: ៤<br/>         គាត់អោយលុយច្រើនបើអត់ពាក់ស្រោម: ៥<br/>         ស្មោះស្ម័គ្រ/យល់ចិត្តគ្នា: ៦<br/>         អត់មានស្រោមអនាម័យ: ៧<br/>         រង្វង់ដោយសារប្រើថ្នាំញៀន ឬ គ្រឿងស្រវឹង: ៨<br/>         ផ្សេងៗ (សូមបញ្ជាក់).....: ៩</p>                                                                                                    |  |  |
| <p>៣៤</p> | <p>ក្នុងកំឡុងពេលនាងមករដូវនៅខែចុងក្រោយ តើនាងឈប់រួមភេទប៉ុន្មានថ្ងៃ?</p>                                                                          | <p>ចំនួន..... ថ្ងៃ<br/>         មិនបានឈប់: ០<br/>         មិនដែលរួមភេទ: ៩៦<br/>         មិនមានរដូវ: ៩៧</p>                                                                                                                                                                                                                                                                                                        |  |  |
| <p>៣៥</p> | <p>ក្នុងរយៈពេល ៣ខែកន្លងមក តើនាងមានបានទទួលការអប់រំ ស្តីពីជំងឺអេដស៍/មេរោគអេដស៍ ឬជំងឺកាមរោគតាមមធ្យោបាយណាខ្លះ? (សូមអានចម្លើយ, ចម្លើយច្រើន)</p>     | <p>មិនដែលបានទទួលព័ត៌មាន ការអប់រំ: ០<br/>         ទូរទស្សន៍: ១<br/>         វីឡូ: ២<br/>         កាសែត (សារព័ត៌មាន): ៣<br/>         ផ្ទាំងរូបភាពធំៗ (បៀលបត): ៤<br/>         ផ្ទាំងរូបភាពសំរាប់អប់រំ: ៥<br/>         កូនសៀវភៅអប់រំ: ៦<br/>         ការពិភាក្សាជាក្រុមជាមួយបុគ្គលិកចុះផ្ទាល់: ៧<br/>         ការផ្តល់ប្រឹក្សាជាបុគ្គល: ៨<br/>         អ្នកអប់រំបន្ត: ៩<br/>         ផ្សេងៗ(សូមបញ្ជាក់) .....: ១០</p> |  |  |
| <p>៣៦</p> | <p>ក្នុងរយៈពេល ៣ខែកន្លងមក តើនាងមានបានទទួលព័ត៌មានការអប់រំ ស្តីពីជំងឺអេដស៍/ជំងឺកាមរោគ តាមរយៈបុគ្គលិកអប់រំណាខ្លះ? (សូមអានចម្លើយ, ចម្លើយច្រើន)</p> | <p>មិនដែលបានទទួលព័ត៌មាន ការអប់រំ: ០<br/>         បុគ្គលិក គ្លីនិកកាមរោគ ១<br/>         បុគ្គលិក គ្លីនិកអង្គការ ២<br/>         បុគ្គលិកចុះអប់រំផ្ទាល់ ៣<br/>         អ្នកអប់រំបន្ត/មិត្តអប់រំមិត្ត ៤<br/>         បុគ្គលិកមជ្ឈមណ្ឌលធ្វើតេស្តឈាមដោយស្ម័គ្រចិត្ត និងរក្សាការសំងាត់ ៥<br/>         គ្រូពេទ្យឬបុគ្គលិកនៅគ្លីនិកឯកជន ៦</p>                                                                              |  |  |

|    |                                                                                    |                                                                                                                                                                                                                                                                                               |  |  |
|----|------------------------------------------------------------------------------------|-----------------------------------------------------------------------------------------------------------------------------------------------------------------------------------------------------------------------------------------------------------------------------------------------|--|--|
|    |                                                                                    | ផ្សេងៗ (សូមបញ្ជាក់) ..... ៧                                                                                                                                                                                                                                                                   |  |  |
| ៣៧ | ក្នុងរយៈពេល ១២ខែកន្លងមក តើគេដែលអោយស្រោមអនាម័យនាងដែរឬទេ?                            | ចាស់ ១<br>ទេ ២                                                                                                                                                                                                                                                                                |  |  |
| ៣៨ | ក្នុងរយៈពេល ៣ខែកន្លងមក តើនាងដែលបានទទួលស្រោមអនាម័យដោយមិនបាច់ចំណាយ ប្រាក់យ៉ាងណាដែរ?  | មិនបានទទួលស្រោមអនាម័យ; ០<br>បានទទួលស្រោមអនាម័យដោយមិនបាច់<br>ចំណាយប្រាក់ ១<br>ពេលខ្លះទទួលបានមិនបាច់ចំណាយប្រាក់<br>ពេលខ្លះទិញ ២<br>តែងតែទិញស្រោមអនាម័យ ៣<br>ស្រោមអនាម័យរបស់ភ្ញៀវ ឬមិត្តប្រុស ៤<br>មិនទទួលស្រោមអនាម័យដែលមិនបាច់<br>ចំណាយប្រាក់ ៥                                                 |  |  |
| ៣៩ | ក្នុងរយៈពេល ៣ខែកន្លងមក តើនាងបានទទួលស្រោមអនាម័យមកពីកន្លែងណាខ្លះ? (អាចមានចំលើយច្រើន) | មិនដែលប្រើស្រោមអនាម័យ៖ ០<br>នៅកន្លែងដែលខ្ញុំធ្វើការ៖ ១<br>បានពីភ្ញៀវ ឬមិត្តប្រុស៖ ២<br>ពីបុគ្គលិកចុះអប់រំផ្ទាល់៖ ៣<br>អ្នកអប់រំបន្ត/មិត្តអប់រំមិត្ត៖ ៤<br>ពីកន្លែងលក់ថ្នាំ ៖៥<br>គ្លីនិកសុខភាពគ្រួសារ/មណ្ឌលសុខភាព/<br>មន្ទីរពេទ្យរដ្ឋ៖ ៦<br>គ្លីនិករបស់អង្គការ ៧<br>ផ្សេងៗ (សូមបញ្ជាក់).....៨ |  |  |

**ផ្នែកទី៣: ការប្រព្រឹត្តហិង្សាផ្លូវភេទ**

| លរ  | សំណួរ                                                                                 | ក្នុង ចម្លើយ                     | រំលង | ក្នុង |
|-----|---------------------------------------------------------------------------------------|----------------------------------|------|-------|
| ៤០a | តើប្តី/ដៃគូរួមភេទរបស់នាងធ្លាប់ប្រើអំពើហិង្សា វាយធ្វើបាបបង្ខិតបង្ខំលើរាងកាយនាង ដែរឬទេ? | ចាស់; ១<br>ទេ; ២<br>មិនឆ្លើយ; ៩៨ |      |       |



|     |                                                                                                                                                              |                                                           |  |  |
|-----|--------------------------------------------------------------------------------------------------------------------------------------------------------------|-----------------------------------------------------------|--|--|
| ៤០b | តើអំពើហឹង្សាទាំងនេះ<br>វាកើតមានញឹកញាប់យ៉ាង<br>ណាក្នុងរយៈពេល<br>១២ខែកន្លងមក?                                                                                  | ញឹកញាប់; ១<br>ម្តងម្កាល; ២<br>មិនដែលសោះ; ៣<br>មិនឆ្លើយ; ៤ |  |  |
| ៤១a | ក្រៅពីប្តី/ដៃគូរួមភេទរបស់នា<br>ង តើមានអ្នកណាផ្សេង<br>ធ្លាប់ដែលប្រើអំពើហឹង្សា<br>វាយធ្វើបាប<br>បង្ខិតបង្ខំលើរាងកាយនាងដែរ<br>ឬទេ?                              | ចាស់; ១<br>ទេ; ២<br>មិនឆ្លើយ; ៤                           |  |  |
| ៤១b | តើអំពើហឹង្សាទាំងនេះ<br>វាកើតមានញឹកញាប់យ៉ាង<br>ណាក្នុងរយៈពេល<br>១២ខែកន្លងមក?                                                                                  | ញឹកញាប់; ១<br>ម្តងម្កាល; ២<br>មិនដែលសោះ; ៣<br>មិនឆ្លើយ; ៤ |  |  |
| ៤២a | តើនាងធ្លាប់ត្រូវបានប្តី/ដៃគូរួម<br>ភេទរបស់នាង ប្រើអំពើហឹង្សា<br>វាយធ្វើបាបបង្ខិតបង្ខំលើរាង<br>កាយ នាង<br>នៅពេលគាត់ចង់រួមភេទ<br>ហើយនាងមិនចង់រួមភេទដែរ<br>ឬទេ? | ចាស់; ១<br>ទេ; ២<br>មិនឆ្លើយ; ៤                           |  |  |
| ៤២b | តើអំពើហឹង្សាទាំងនេះ<br>វាកើតមានញឹកញាប់យ៉ាង<br>ណាក្នុងរយៈពេល<br>១២ខែកន្លងមក?                                                                                  | ញឹកញាប់; ១<br>ម្តងម្កាល; ២<br>មិនដែលសោះ; ៣<br>មិនឆ្លើយ; ៤ |  |  |
| ៤៣a | ក្រៅពីប្តី/ដៃគូរួមភេទរបស់នា<br>ង<br>តើនាងធ្លាប់ត្រូវបានអ្នកណា<br>ផ្សេងប្រើអំពើហឹង្សាវាយធ្វើបា<br>បបង្ខិតបង្ខំលើរាងកាយនាង<br>នៅពេលគាត់ចង់រួមភេទ               | ចាស់; ១<br>ទេ; ២<br>មិនឆ្លើយ; ៤                           |  |  |

|                                                 |                                                                                                                            |                                                           |  |  |
|-------------------------------------------------|----------------------------------------------------------------------------------------------------------------------------|-----------------------------------------------------------|--|--|
|                                                 | ហើយនាងមិនចង់រួមភេទដែរ<br>ឬទេ?                                                                                              |                                                           |  |  |
| ៤៣b                                             | តើអំពើហឹង្សាទាំងនេះ<br>វាកើតមានញឹកញាប់យ៉ាង<br>ណាក្នុងរយៈពេល<br>១២ខែកន្លងមក?                                                | ញឹកញាប់; ១<br>ម្តងម្កាល; ២<br>មិនដែលសោះ; ៣<br>មិនឆ្លើយ; ៤ |  |  |
| ៤៤a                                             | តើនាងធ្លាប់បានត្រូវគេបង្ខំរួម<br>ភេទជាមួយបុរសជាក្រុម*នៅ<br>ពេលដែលនាងមិនចង់រួមភេទ<br>ដែរឬទេ?<br><br>*បុរសចាប់ពីពីរនាក់ឡើងទៅ | ចាស់; ១<br>ទេ; ២<br>មិនឆ្លើយ; ៤៨                          |  |  |
| ៤៤b                                             | តើអំពើហឹង្សាទាំងនេះ<br>វាកើតមានញឹកញាប់យ៉ាង<br>ណាក្នុងរយៈពេល<br>១២ខែកន្លងមក?                                                | ញឹកញាប់; ១<br>ម្តងម្កាល; ២<br>មិនដែលសោះ; ៣<br>មិនឆ្លើយ; ៤ |  |  |
| ប្រសិនបើចម្លើយ "ចាស់" ក្នុងសំណួរ ៤០-៤៤ សូមបន្ត៖ |                                                                                                                            |                                                           |  |  |
| ៤៥                                              | តើនាងបានទៅស្វែងរកគ្រូពេ<br>ទ្យជួយ<br>ឬព្យាបាលរមួសដែរឬទេ?<br>ក្រោយពីមានអំពើហឹង្សាបង្ខំ<br>រួមភេទពីនរណាម្នាក់?               | ចាស់; ១<br>ទេ; ២<br>មិនឆ្លើយ; ៤៨                          |  |  |

**ផ្នែកទី៤: ការប្រើប្រាស់គ្រឿងញៀន**

| លរ | សំណួរ                                                                                                                                      | ក្នុង ចម្លើយ                                                   | រំលង    | ក្នុង |
|----|--------------------------------------------------------------------------------------------------------------------------------------------|----------------------------------------------------------------|---------|-------|
| ៤៦ | មានអ្នកខ្លះបានប្រើប្រាស់<br>គ្រឿងញៀន ដើម្បីមូលហេតុ<br>ផ្សេងៗ ដូចជា ការសប្បាយ<br>ដើម្បីបង្កើនកំលាំង តើនាងធ្លាប់<br>បានប្រើប្រាស់គ្រឿងញៀនដែរ | ចាស់ធ្លាប់; ១<br>មិនធ្លាប់; ២<br>គ្មានចម្លើយ: ៤៨<br>មិនដឹង: ៤៩ | ទៅសំនួរ | ៤៩    |

|           |                                                                                                                                                                 |                                                                                                                                                                                                                                                                |  |  |
|-----------|-----------------------------------------------------------------------------------------------------------------------------------------------------------------|----------------------------------------------------------------------------------------------------------------------------------------------------------------------------------------------------------------------------------------------------------------|--|--|
|           | <p>ឬទេ? (សូមរំលឹកអ្នកចូលរួមថា ចម្លើយរបស់គាត់គឺជាកជននឹងសម្ងាត់)</p>                                                                                              |                                                                                                                                                                                                                                                                |  |  |
| <p>៤៧</p> | <p>ក្នុងរយៈពេល ១២ខែចុងក្រោយនេះ តើថ្នាំប្រភេទណាខ្លះដែលនាងបានប្រើ?<br/>(សូមអានចំលើយ អាចមានចំលើយច្រើន)</p>                                                         | <p>មិនដែលប្រើគ្រឿងញៀនក្នុងមួយឆ្នាំកន្លងទៅនេះ: ០<br/>ហេរូអ៊ីន: ១<br/>ម្សៅអំប៊ូតាមីន (ទឹកកក យ៉ាម៉ា): ២<br/>អ៊ីចតាស៊ី: ៣<br/>ថ្នាំសំរាប់គេងលក់ (Valium, Diazepam): ៥<br/>ហិតការ: ៥<br/>កញ្ឆា: ៦<br/>គ្រឿងញៀនផ្សេងទៀត (សូមបញ្ជាក់).....: ៧<br/>គ្មានចម្លើយ: ៩៨</p> |  |  |
| <p>៤៨</p> | <p>ក្នុងរយៈពេល ១២ខែកន្លងមក តើនាងធ្លាប់បានចាក់ថ្នាំញៀនដែរឬទេ?</p>                                                                                                | <p>ចាស៍ ធ្លាប់: ១<br/>ទេ មិនធ្លាប់: ២<br/>គ្មានចម្លើយ: ៩៨<br/>មិនដឹង: ៩៩</p>                                                                                                                                                                                   |  |  |
| <p>៤៩</p> | <p>ក្នុងរយៈពេល ១សប្តាហ៍កន្លងមក តើនាងផឹកគ្រឿងស្រវឹង ញឹកញាប់ប៉ុណ្ណាដែរពេលកំពុងបំពេញការងាររបស់នាង?</p>                                                             | <p>ចំនួនថ្ងៃ .....ថ្ងៃ<br/>មិនដែលសោះ: ០<br/>រៀងរាល់ថ្ងៃ: ៧</p>                                                                                                                                                                                                 |  |  |
| <p>៥០</p> | <p>ក្នុងរយៈពេល ១សប្តាហ៍កន្លងមក ជាធម្មតា តើនាងផឹកគ្រឿងស្រវឹងច្រើនយ៉ាងណាដែរពេលកំពុងធ្វើការងារ? (គ្រឿងស្រវឹងមួយមានន័យថា ស្រាបៀរមួយកំប៉ុង = មួយដប = ស្រាមួយកែវ)</p> | <p>ចំនួនគ្រឿងស្រវឹង .....<br/>មិនដែលផឹក: ០<br/>គ្រឿងស្រវឹង៩៦កំប៉ុង/កែវ ឬ ច្រើនជាង: ៩៦<br/>គ្រឿងស្រវឹងតិចជាង ១កំប៉ុង/កែវ: ៩៧</p>                                                                                                                                |  |  |

**ផ្នែកទី៥: ឥរិយាបថក្នុងការប្រើប្រាស់សេវាសុខាភិបាល**

| លរ | សំណួរ                                                                                                 | ក្នុង ចម្លើយ                                                                                                                                                                                                                                                        | រំលង    | ក្នុង |
|----|-------------------------------------------------------------------------------------------------------|---------------------------------------------------------------------------------------------------------------------------------------------------------------------------------------------------------------------------------------------------------------------|---------|-------|
| ៥១ | ក្នុងរយៈពេល ១២ខែកន្លងមក តើនាងមានធ្លាប់មានជំងឺនៅប្រដាប់ភេទដែរឬទេ?                                      | ធ្លាប់: ១<br>មិនធ្លាប់: ២                                                                                                                                                                                                                                           |         |       |
| ៥២ | ក្នុងរយៈពេល ១២ខែកន្លងមក តើនាងមានធ្លាប់កើតជំងឺសេម៉ាន់ដែររឺទេ?                                          | ធ្លាប់: ១<br>មិនធ្លាប់: ២                                                                                                                                                                                                                                           |         |       |
| ៥៣ | ក្នុងរយៈពេល ១២ខែកន្លងមក តើនាងមានធ្លាប់ធ្លាក់សតាមទ្វារមាសខុសធម្មតាដែររឺទេ?                             | ធ្លាប់: ១<br>មិនធ្លាប់: ២                                                                                                                                                                                                                                           |         |       |
| ៥៤ | ក្នុងរយៈពេល ១២ខែកន្លងមក តើនាងមានធ្លាប់ឈឺចាប់ផ្នែកខាងក្រោមនៃពោះដែរឬទេ? (សូមចង្អុលចំផ្នែកខាងក្រោមនៃពោះ) | ធ្លាប់: ១<br>មិនធ្លាប់: ២                                                                                                                                                                                                                                           |         |       |
| ៥៥ | ក្នុងរយៈពេល ១២ខែកន្លងមក តើនាងគិតថាខ្លួនមានឆ្លងជំងឺកាមរោគដែរឬទេ?                                       | ធ្លាប់: ១<br>មិនធ្លាប់: ២                                                                                                                                                                                                                                           |         |       |
| ៥៦ | ក្នុងរយៈពេល ១២ខែកន្លងមក ពេលនាងមានជំងឺកាមរោគចុងក្រោយនេះ តើនាងទៅព្យាបាលនៅកន្លែងណា? (ចំលើយមានតែ១)        | មិនដែលមានជំងឺកាមរោគ: ០<br>មណ្ឌលសុខភាព/ពេទ្យរដ្ឋ: ១<br>គ្លីនិកសុខភាពគ្រួសារ (គ្លីនិកកាមរោគរដ្ឋ): ២<br>គ្លីនិកកាមរោគរបស់អង្គការ: ៣<br>គ្លីនិកឯកជន: ៤<br>គ្រូខ្មែរ/គ្រូបុរាណ: ៥<br>ទិញថ្នាំដែលគេផ្សំអោយនៅឱសថស្ថាន: ៦<br>មិនព្យាបាលសោះ: ៧<br>ផ្សេងៗ(សូមបញ្ជាក់).....: ៨ | ទៅសំនួរ | ៥៨    |

|    |                                                                                                                                   |                                                                                                                                                                                                                                                                                                                                                                                                                                                                                                    |  |  |
|----|-----------------------------------------------------------------------------------------------------------------------------------|----------------------------------------------------------------------------------------------------------------------------------------------------------------------------------------------------------------------------------------------------------------------------------------------------------------------------------------------------------------------------------------------------------------------------------------------------------------------------------------------------|--|--|
| ៥៧ | <p>ក្នុងរយៈពេល ១២ខែកន្លងមក តើនាងបានឈប់រួមភេទ ចំនួនប៉ុន្មានថ្ងៃ? ពេលដែលអ្នក មាន ជំងឺកាមរោគចុងក្រោយ (សូមអានចំលើយ, ចំលើយ មានតែ១)</p> | <p>មិនដែលរួមភេទ: ០<br/> មិនបានឈប់រួមភេទ: ១<br/> ១ថ្ងៃ ទៅ ៣ថ្ងៃ: ២<br/> ៤ថ្ងៃ ទៅ ១០ថ្ងៃ: ៣<br/> រហូតដល់ព្យាបាលចប់: ៤<br/> រហូតដល់ជាសះស្បើយ: ៥</p>                                                                                                                                                                                                                                                                                                                                                   |  |  |
| ៥៨ | <p>ពេលបច្ចុប្បន្ន តើនាងប្រើ មធ្យោបាយ ឬ វិធីសាស្ត្រអ្វី ដើម្បីបង្ការកុំអោយមានកូន? (អាចមានចំលើយច្រើន)</p>                           | <p>មិនដែលរួមភេទ: ០<br/> មិនប្រើវិធីសាស្ត្រពន្យាកំណើតណាមួយ<br/> ឡើយ: ១<br/> ចងដៃស្បូន: ២<br/> ចងបំពង់ទឹកកាមបុរស: ៣<br/> លេបថ្នាំរាល់ថ្ងៃ: ៤<br/> លេបថ្នាំរាល់ខែ: ៥<br/> ចាក់ថ្នាំ: ៦<br/> ដាក់កងក្នុងស្បូន: ៧<br/> ដាក់កងដៃ: ៨<br/> ស្រោមអនាម័យបុរស: ៩<br/> ស្រោមអនាម័យស្ត្រី: ១០<br/> បំបៅដោះកូន: ១១<br/> ថ្នាំរងាប់មេជីវិតបុរស: ១២<br/> វិធីប្រតិទិន: ១៣<br/> ដកសិដ្ឋចេញក្រៅមុនពេលចេញទឹកកាម<br/> (ចាក់ទឹកក្រៅពង): ១៤<br/> ថ្នាំពន្យាកំណើតក្រោយការរួមភេទ: ១៥<br/> ផ្សេងៗ(សូមបញ្ជាក់) .....: ១៦</p> |  |  |

**ផ្នែកទី៦: ចំណេះដឹងពីស្ថានភាពជំងឺអេដស៍ និងជំងឺកាមរោគ**

| លរ | សំណួរ                                                                        | ក្នុង ចម្លើយ                     | រំលង | ក្នុង |
|----|------------------------------------------------------------------------------|----------------------------------|------|-------|
| ៥៩ | <p>តើនាងដឹងថាត្រូវទៅទីណាទេ ប្រសិនបើនាងត្រូវការធ្វើតេស្ត ឈាមរកមេរោគអេដស៍?</p> | <p>ចាស់ដឹង: ១<br/> មិនដឹង: ២</p> |      |       |

|    |                                                                                                              |                                                                                                                                                                                                                                                                                               |         |    |
|----|--------------------------------------------------------------------------------------------------------------|-----------------------------------------------------------------------------------------------------------------------------------------------------------------------------------------------------------------------------------------------------------------------------------------------|---------|----|
| ៦០ | ក្នុងរយៈពេល ១២ខែកន្លងមក តើនាងធ្លាប់ធ្វើតេស្តឈាមរកមេរោគអេដស៍ដែរឬទេ?                                           | ធ្លាប់: ១<br>មិនធ្លាប់: ២                                                                                                                                                                                                                                                                     |         |    |
| ៦១ | ប្រសិនបើនាងធ្លាប់ធ្វើតេស្តឈាមរកមេរោគអេដស៍ តើរយៈពេលប៉ុន្មានខែកន្លងមកហើយ?                                      | ចំនួន..... ខែ<br>មិនដែលធ្វើតេស្តឈាម: ០<br>តិចជាង ឬស្មើ១ខែ: ១<br>លើសពី១ឆ្នាំមុន: ១៣                                                                                                                                                                                                            |         |    |
| ៦២ | តើនាងធ្វើតេស្តឈាមរកមេរោគអេដស៍ចុងក្រោយបង្អស់នៅកន្លែងណា?                                                       | មិនដែលធ្វើតេស្តឈាម: ០<br>គ្លីនិកឯកជន ឬមន្ទីរពិសោធន៍: ១<br>មន្ទីរពេទ្យរដ្ឋ: ២<br>មជ្ឈមណ្ឌលធ្វើតេស្តឈាមដោយស្ម័គ្រចិត្ត និងរក្សាការសំងាត់ (រដ្ឋ): ៣<br>មជ្ឈមណ្ឌលធ្វើតេស្តឈាមដោយស្ម័គ្រចិត្ត និងរក្សាការសំងាត់(អង្គការ): ៤<br>ការធ្វើតេស្តឈាមចល័ត: ៥<br>ឱសថស្ថាន: ៦<br>ផ្សេងៗ(សូមបញ្ជាក់).....: ៧ | ទៅសំនួរ | ៦៩ |
| ៦៣ | តើនាងបានទទួលលទ្ធផលនៃការធ្វើតេស្តឈាមរកមេរោគអេដស៍ ចុងក្រោយដែររឺទេ? (នាងមិនចាំបាច់ប្រាប់ខ្ញុំពីលទ្ធផលទេ)        | បាន: ១<br>មិនបាន: ២                                                                                                                                                                                                                                                                           |         |    |
| ៦៤ | តើអ្នកមានអារម្មណ៍មិនទើសទាល់ ក្នុងការប្រាប់ខ្ញុំពីលទ្ធផលនៃការធ្វើតេស្តឈាមរកមេរោគអេដស៍ចុងក្រោយ របស់អ្នកដែរឬទេ? | ចាស់: ១<br>ទេ: ២                                                                                                                                                                                                                                                                              | ទៅសំនួរ | ៦៩ |
| ៦៥ | ប្រសិនបើនាងមានអារម្មណ៍មិនទើសទាល់ក្នុងការប្រាប់ខ្ញុំ តើលទ្ធផលតេស្តឈាមរបស់នាងយ៉ាងដូចម្តេចដែរ? (រំលឹកដល់        | លទ្ធផលតេស្តរកមេរោគអេដស៍វិជ្ជមាន: ១<br>លទ្ធផលតេស្តរកមេរោគអេដស៍មិនច្បាស់: ២<br>លទ្ធផលតេស្តរកមេរោគអេដស៍អវិជ្ជមាន: ៣                                                                                                                                                                              | ទៅសំនួរ | ៦៩ |

|    |                                                                                                                            |                                                                                       |         |    |
|----|----------------------------------------------------------------------------------------------------------------------------|---------------------------------------------------------------------------------------|---------|----|
|    | អ្នកឆ្លើយថា ចំលើយរបស់នាង<br>នឹងត្រូវទុកជាការសំងាត់)                                                                        |                                                                                       |         |    |
| ៦៦ | បើលទ្ធផលតេស្តឈាមរកមេ<br>រោគអេដស៍របស់អ្នកវិជ្ជមាន តើ<br>នាងបានធ្វើតេស្តឈាម ប៉ុន្មាន<br>ដងដើម្បីបញ្ជាក់ពីលទ្ធផល<br>នេះ?      | ចំនួន .....                                                                           |         |    |
| ៦៧ | បើលទ្ធផលតេស្តឈាមរកមេ<br>រោគអេដស៍របស់អ្នកវិជ្ជមាន តើ<br>នាងបានទៅចុះឈ្មោះនៅ<br>មណ្ឌលសេវាថែទាំ និង<br>ព្យាបាលជំងឺអេដស៍ដែរឬទេ? | ចាស់: ១<br>ទេ: ២                                                                      |         |    |
| ៦៨ | បើលទ្ធផលតេស្តរកមេរោគអេដ<br>ស៍របស់អ្នកវិជ្ជមាន តើនាង<br>កំពុងបានទទួលឱសថប្រឆាំង<br>នឹងមេរោគអេដស៍ដែរឬទេ?                      | ចាស់: ១<br>ទេ: ២                                                                      |         |    |
| ៦៩ | តើសេវាព្យាបាលដោយប្រើថ្នាំ<br>ស្យាជីវិតអាចរកបាននៅក្នុង<br>ប្រទេសកម្ពុជា សំរាប់អ្នកផ្ទុកមេ<br>រោគអេដស៍ ដែរឬទេ?               | ចាស់: ១<br>ទេ: ២<br>មិនដឹង: ៣                                                         |         |    |
| ៧០ | ក្នុងរយៈពេល ១២ខែកន្លងមក<br>តើអ្នកឧស្សាហ៍ទៅគ្លីនិកពិនិត្យ<br>មើលសុខភាពផ្លូវភេទបាន<br>ប៉ុន្មានដង?                            | ..... ដង<br>មិនដែលបានទៅសោះ៖ ០                                                         | ទៅសំនួរ | ៧៣ |
| ៧១ | ក្នុងរយៈពេល ១ឆ្នាំកន្លងមក តើ<br>នាងបានទៅគ្លីនិក ដើម្បីឱ្យគេ<br>ពិនិត្យសុខភាពផ្លូវភេទលើកចុង<br>ក្រោយ បានប៉ុន្មានខែហើយ?      | ..... ខែ<br>មិនដែលព្យាបាល: ០                                                          |         |    |
| ៧២ | តើគ្លីនិកមួយណាដែលនាងបាន<br>ទៅលើកចុងក្រោយ? (សូម<br>អានចំលើយ មានចំលើយតែ១)                                                    | គ្លីនិកសុខភាពគ្រួសារ(គ្រប់គ្រងដោយ<br>NCHADS): ១<br>គ្លីនិករបស់ក្រសួងសុខាភិបាល/រដ្ឋ: ២ |         |    |

|    |                                                                                                                       |                                                                                                                                                                                                 |  |  |
|----|-----------------------------------------------------------------------------------------------------------------------|-------------------------------------------------------------------------------------------------------------------------------------------------------------------------------------------------|--|--|
|    |                                                                                                                       | គ្លីនិកអង្គការគ្រប់គ្រងដោយ RHAC, MSIC,<br>MEC,PSF: ៣<br>គ្លីនិកអង្គការគ្រប់គ្រងដោយអង្គការផ្សេង<br>ទៀត: ៤<br>គ្លីនិកឯកជន: ៥<br>មិនស្គាល់ឈ្មោះគ្លីនិក: ៦<br>គ្លីនិកផ្សេងទៀត (សូមបញ្ជាក់)..... : ៧ |  |  |
| ៧៣ | នៅពេលដែលនាងរួមភេទ<br>ជាមួយដៃគូស្មោះត្រង់តែម្នាក់<br>ដែលគ្មានមេរោគអេដស៍ តើវា<br>អាចធ្វើឱ្យនាងឆ្លងមេរោគអេដ<br>ស៍ដែរឬទេ? | មិនដឹង: ០<br>ចាស វាអាច: ១<br>ទេ មិនអាច: ២                                                                                                                                                       |  |  |
| ៧៤ | តើស្រោមអនាម័យអាចការពារ<br>ការឆ្លងមេរោគអេដស៍ដែរឬទេ?                                                                    | មិនដឹង: ០<br>ចាស វាអាច: ១<br>ទេ មិនអាច: ២                                                                                                                                                       |  |  |
| ៧៥ | តើអ្នកដែលយើងមើលទៅ<br>ឃើញមានសុខភាពល្អ អាច<br>ចម្លងមេរោគអេដស៍ដែរឬទេ?                                                    | មិនដឹង: ០<br>ចាស វាអាច: ១<br>ទេ មិនអាច: ២                                                                                                                                                       |  |  |
| ៧៦ | តើសត្វមូសអាចចម្លងមេរោគអេ<br>ដស៍ពីមនុស្សដែលមានផ្ទុកមេ<br>រោគអេដស៍ ទៅកាន់មនុស្ស<br>ដែល គ្មានផ្ទុកមេរោគអេដស៍<br>ដែរឬទេ?  | មិនដឹង: ០<br>ចាស វាអាច: ១<br>ទេ មិនអាច: ២                                                                                                                                                       |  |  |
| ៧៧ | តើការញ៉ាំជាមួយអ្នកដែលមាន<br>ផ្ទុកមេរោគអេដស៍ អាចចម្លងមេ<br>រោគអេដស៍ដែរឬទេ?                                             | មិនដឹង: ០<br>ចាស វាអាច: ១<br>ទេ មិនអាច: ២                                                                                                                                                       |  |  |

**ចប់**



សូមផ្ញើររំណេរគុណចំពោះការចូលរួមផ្ញើយ
